# Supplementary figures and images for: Salidroside, 8(E)-Nuezhenide, and Ligustroside from Ligustrum japonicum Fructus Inhibit Expressions of MMP-2 and -9 in HT 1080 Fibrosarcoma
Source: MDPI journal article supplement (doi:10.3390/ijms23052660), 2022-02-28

$^1\text{H}$  NMR and  $^{13}\text{C}$  NMR spectra of 8(E)-nuezhenide (**NZD**)

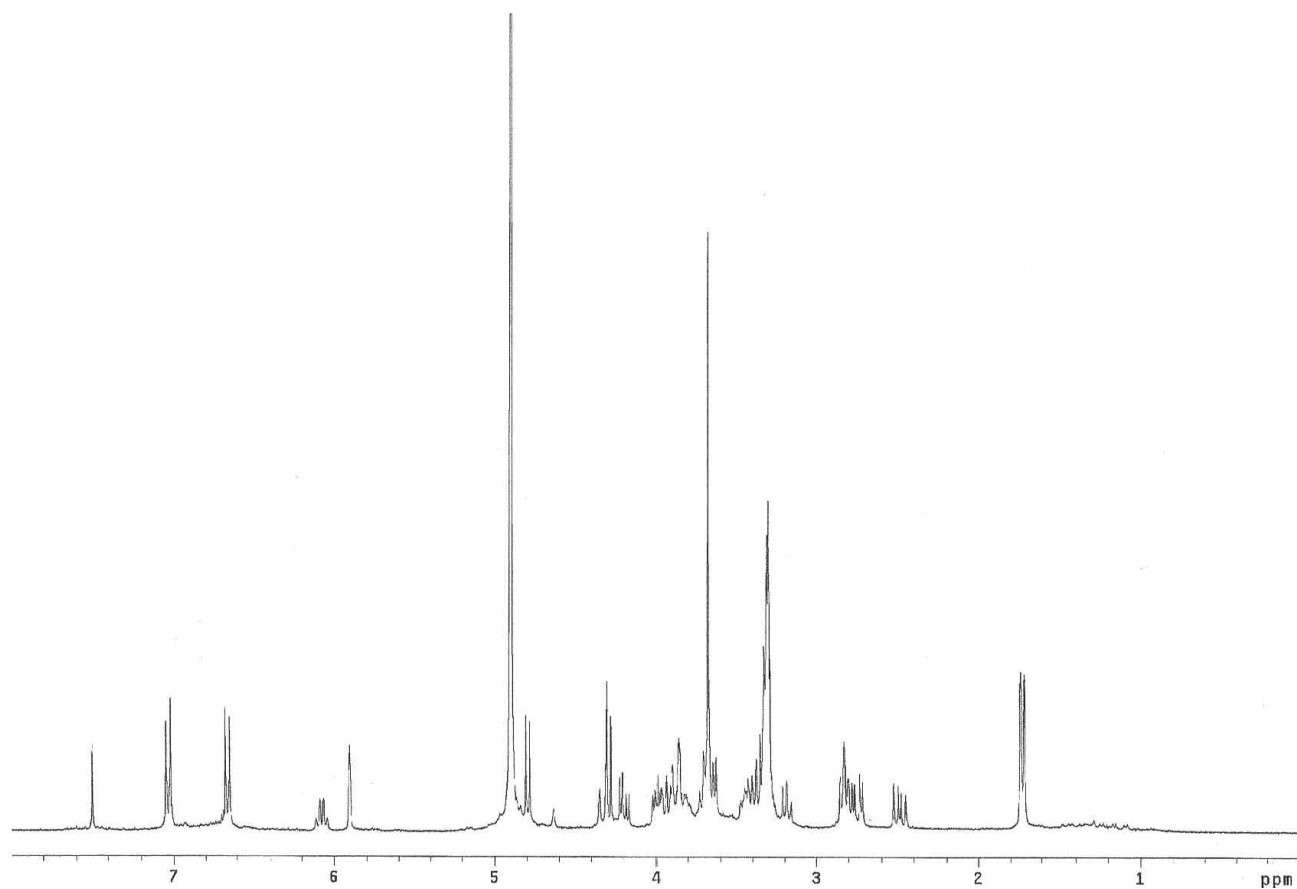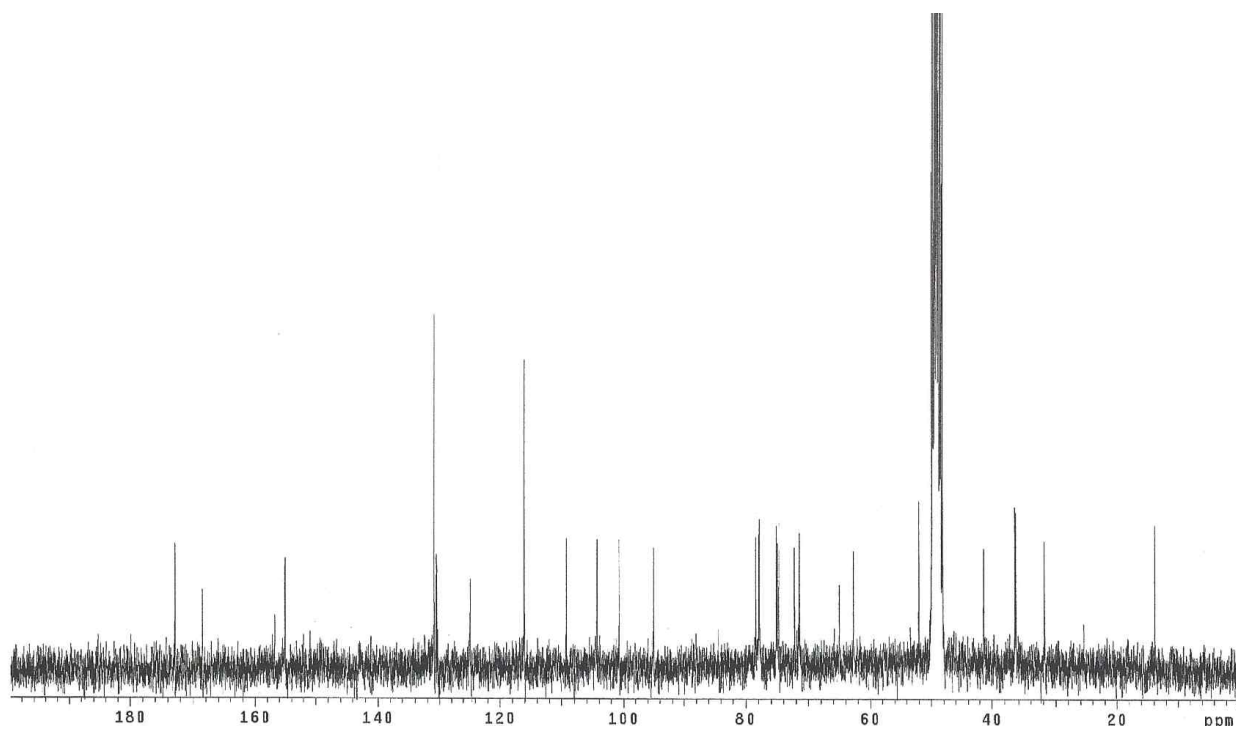

Supplement: s1 [file s1]

$^1\text{H}$  NMR and  $^{13}\text{C}$  NMR spectra of salidroside (SAL)

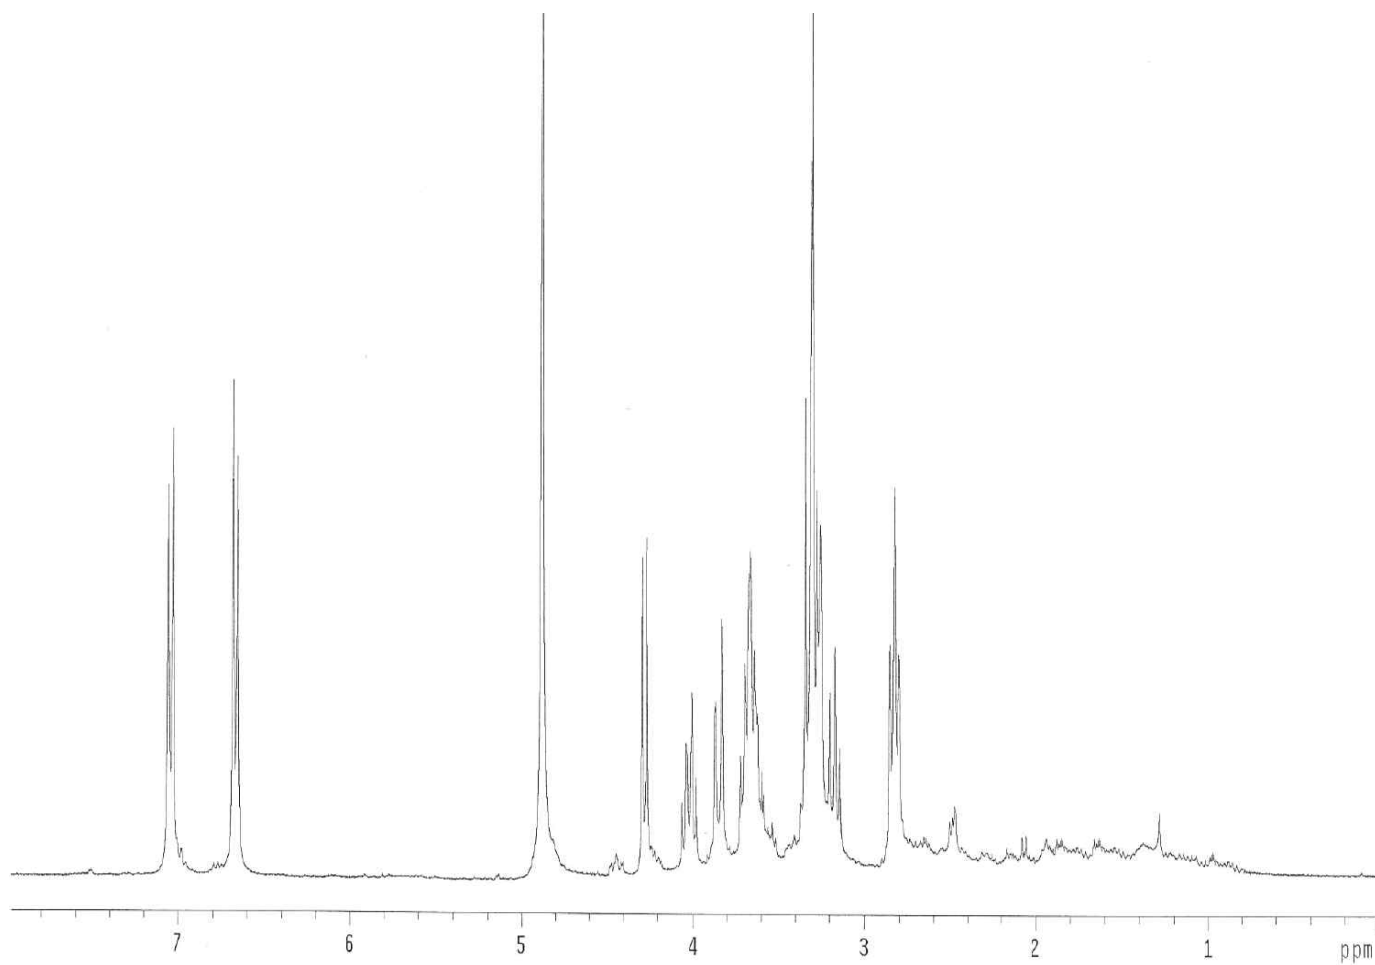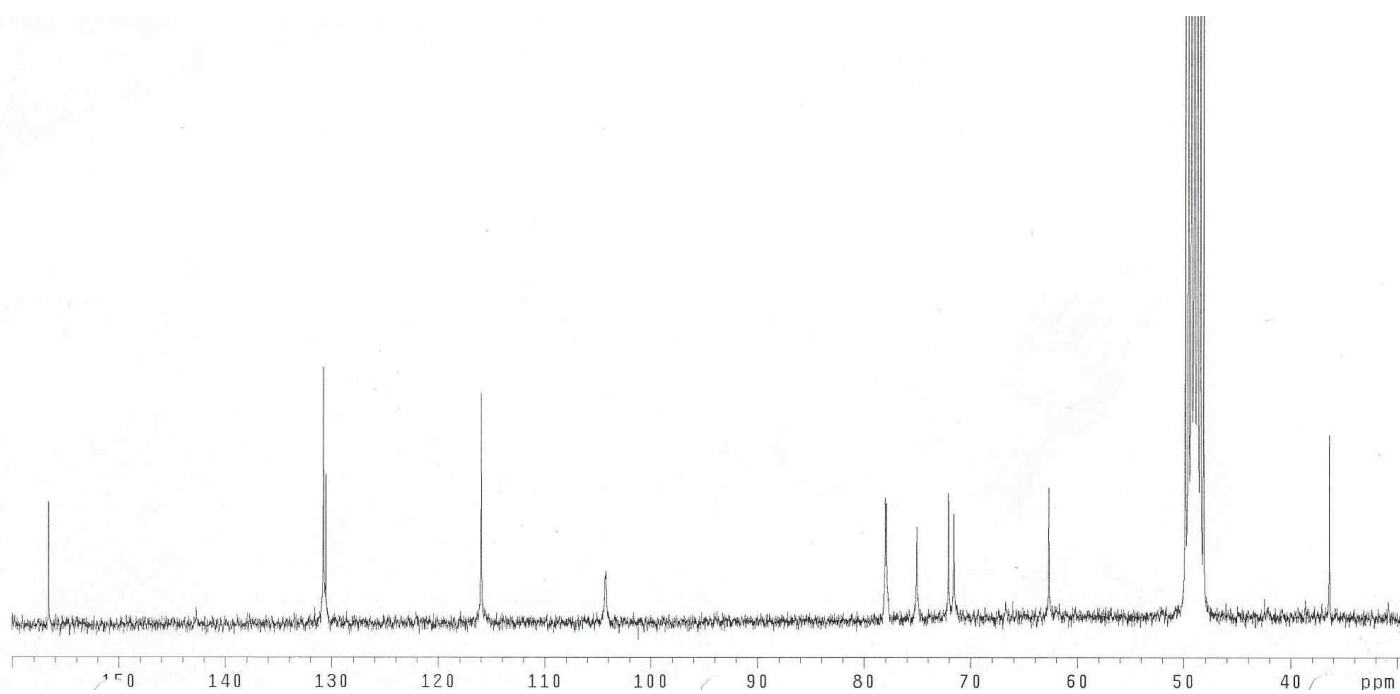

Supplement: s1 [file s1]

$^1\text{H}$  NMR and  $^{13}\text{C}$  NMR spectra of 8(E)-ligustroside (LIG)

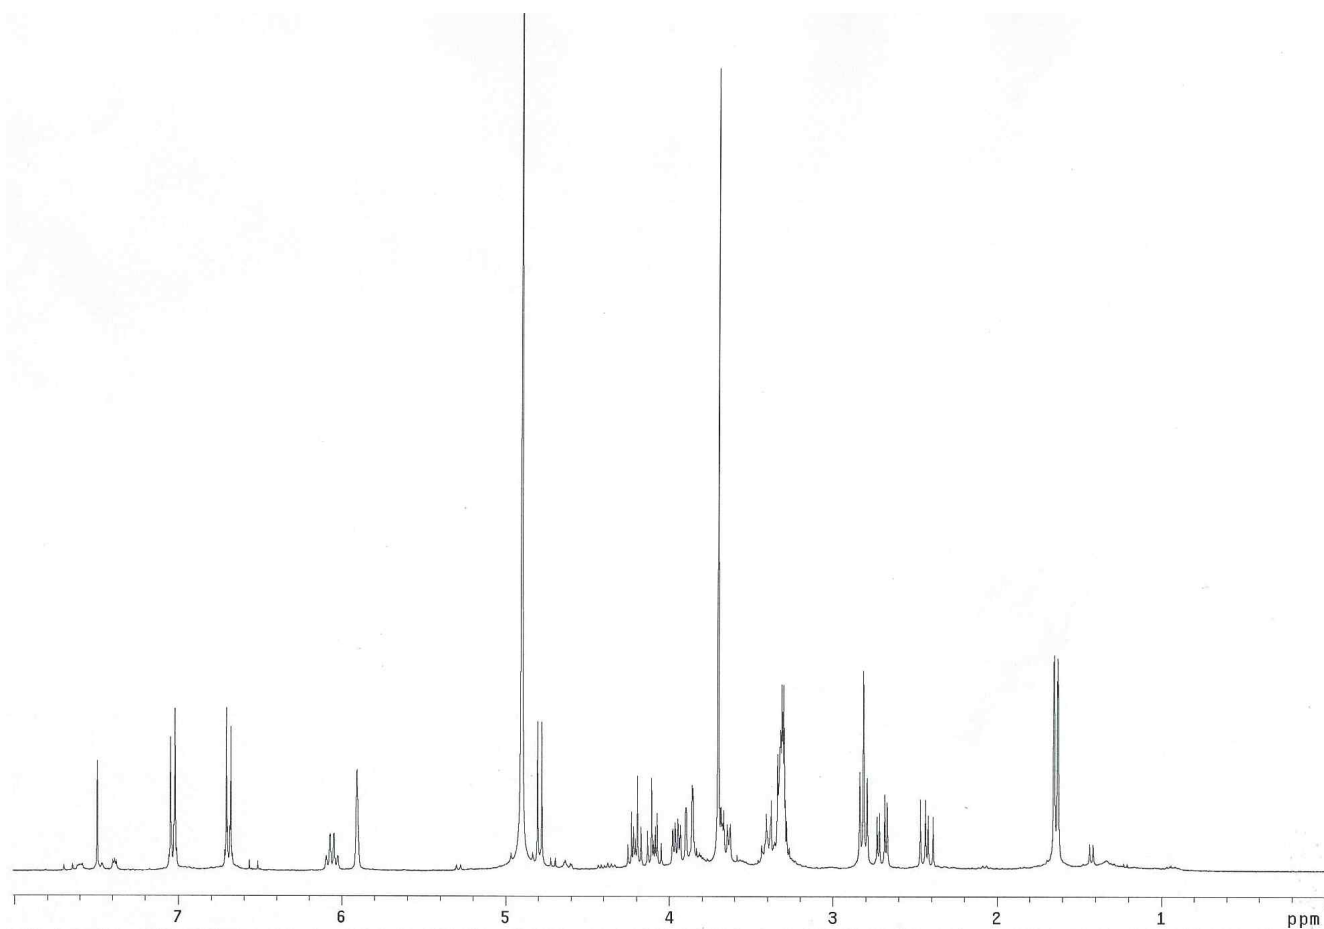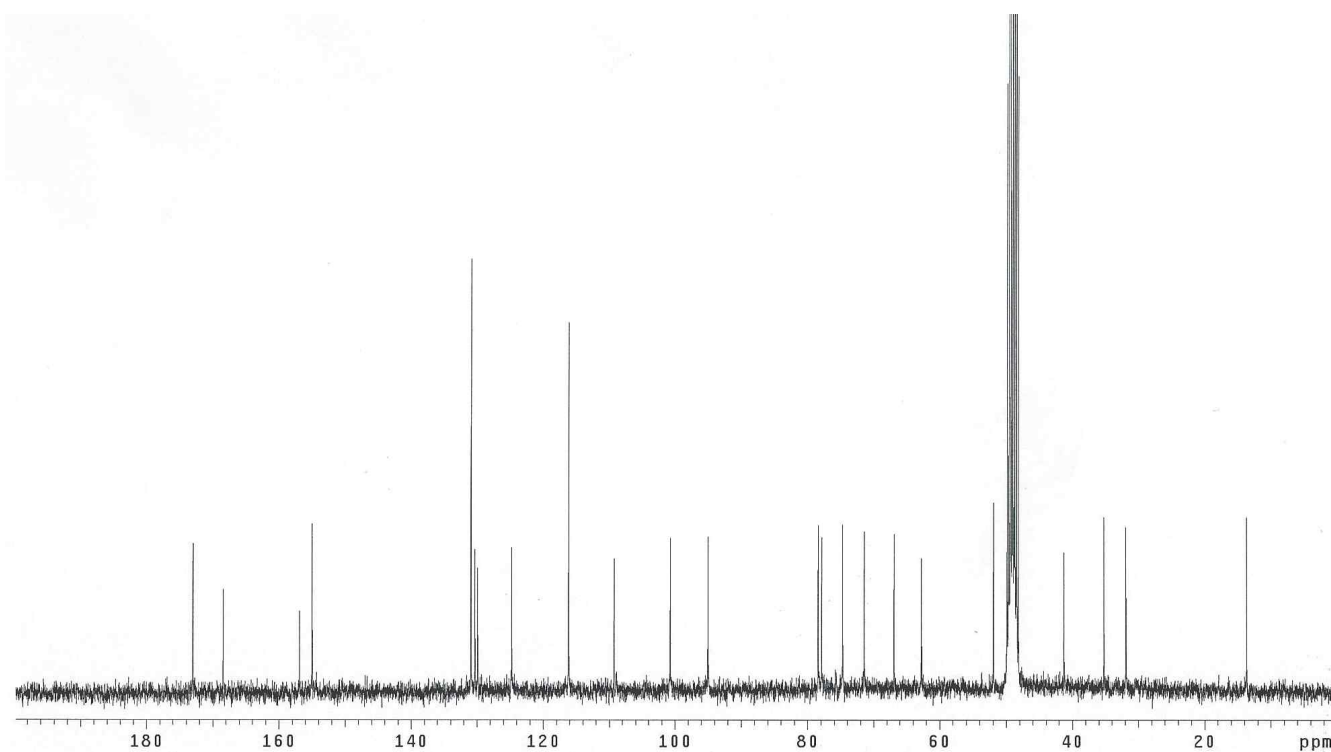

Supplement: s1 [file s1]
